# Supplementary material for: Diagnosis of prostate cancer by detection of minichromosome maintenance 5 protein in urine sediments
Source: PubMed Central journal article supplement (PMC2938246; doi:10.1038/sj.bjc.6605785), 2010-07-20

Supplementary Figure 1

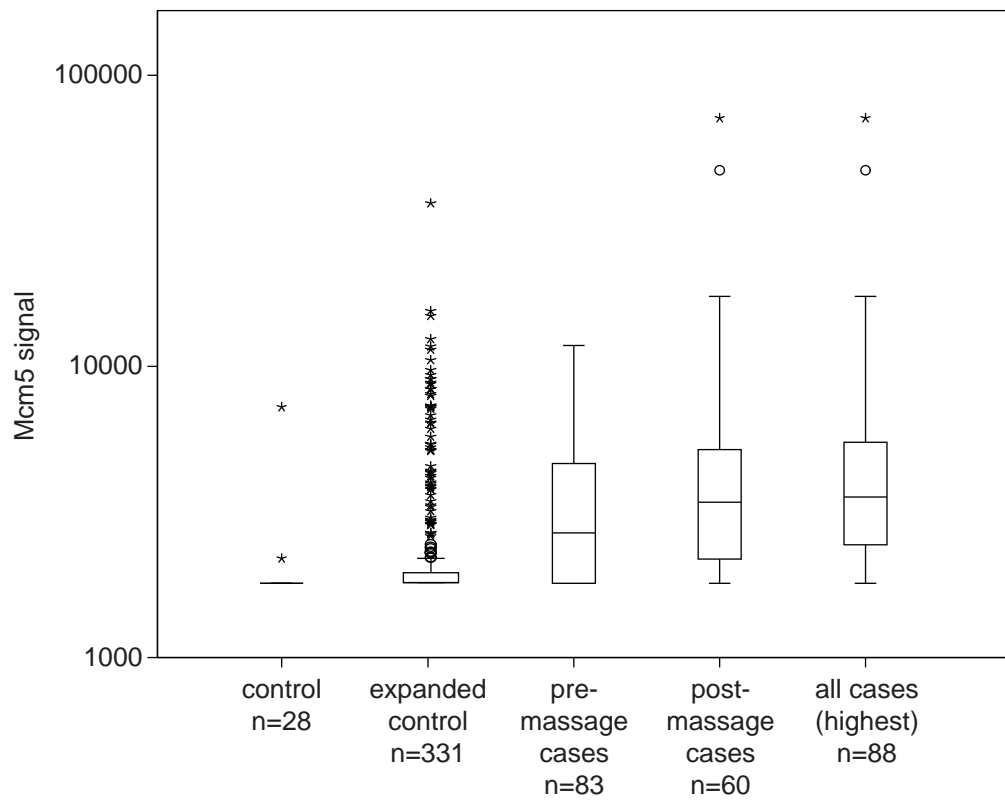

Supplementary Figure 2

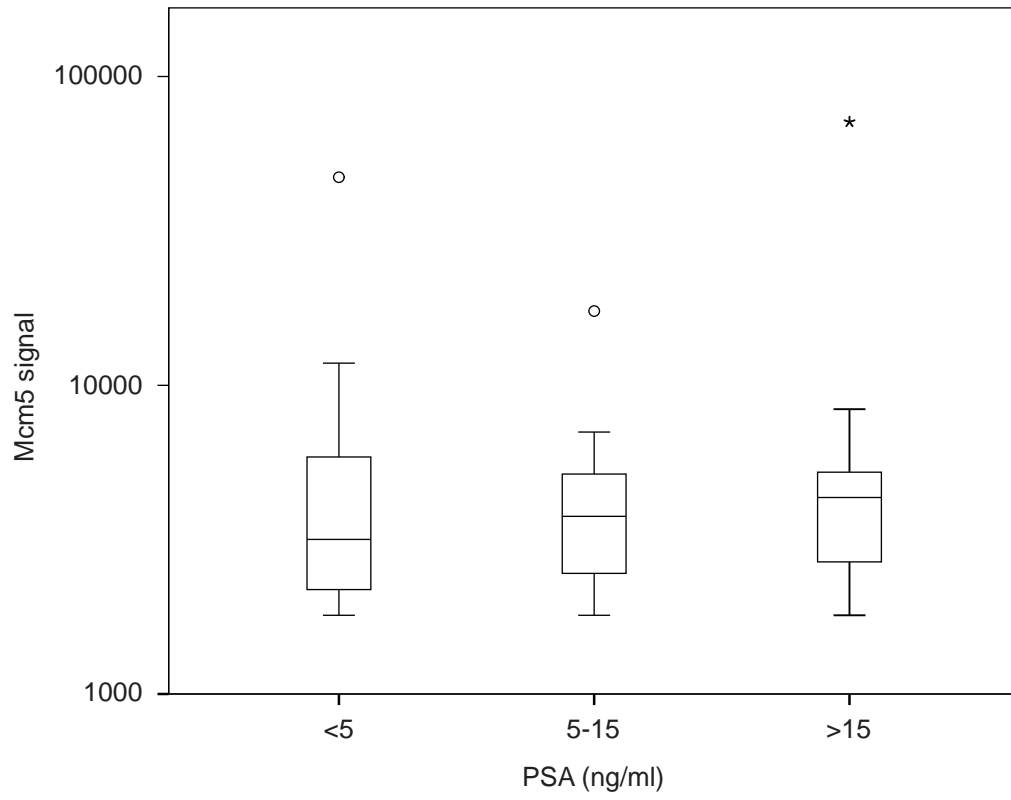

Supplementary Figure 3

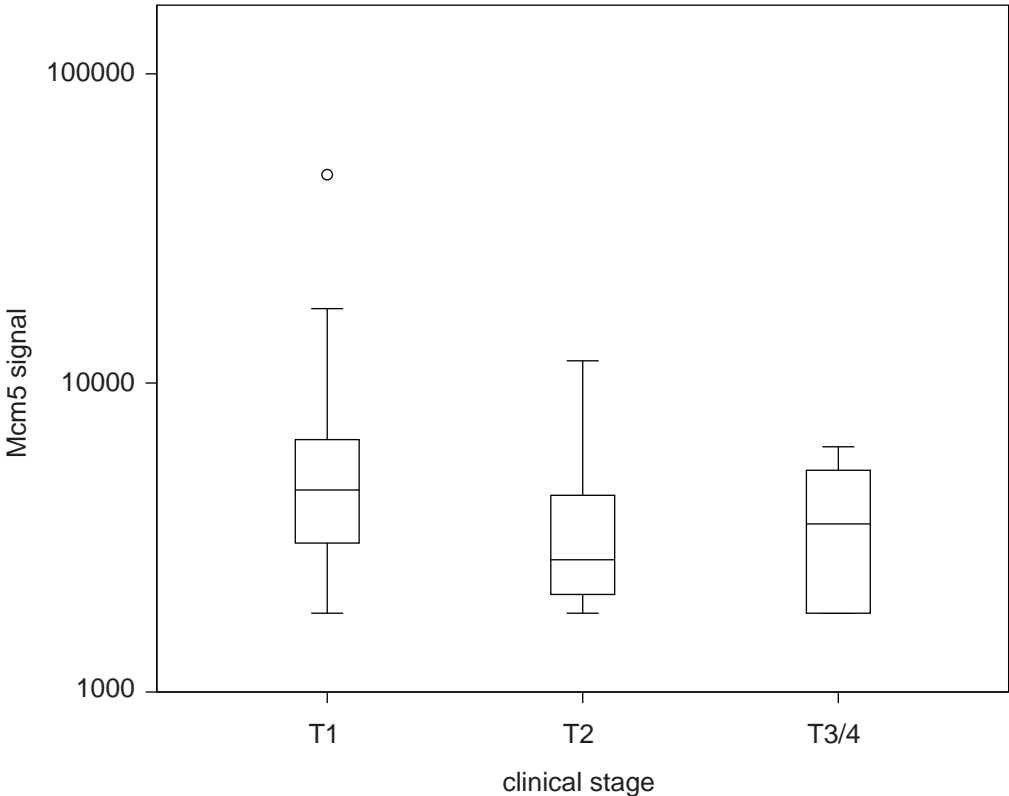

Supplementary Figure 4

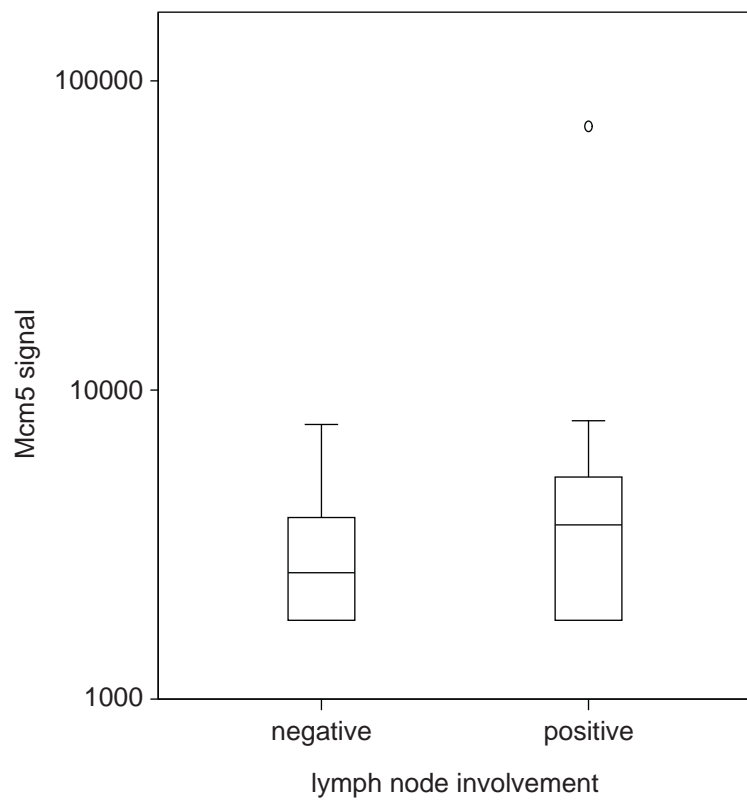

Supplement: 6605785x1.pdf [file 6605785x1.pdf]
