# Supplementary material for: Diagnosis of prostate cancer by detection of minichromosome maintenance 5 protein in urine sediments
Source: PubMed Central journal article supplement (PMC2938246; doi:10.1038/sj.bjc.6605785), 2010-07-20
Supplement: 6605785x2.pdf [file 6605785x2.pdf]

**Supplementary Table 1: 2x2 table for all study participants**

|          | <b>Control</b> | <b>Case</b> | <b>Total</b> |
|----------|----------------|-------------|--------------|
| Negative | 26             | 16          | 42           |
| Positive | 2              | 72          | 74           |
| Total    | 28             | 88          | 116          |

Patients determined to be positive for disease if highest Mcm5 signal available was above cut-point of 1800

<sup>a</sup> Chi-squared test P<0.001

**Supplementary Table 2: 2x2 table for study participants with pre-massage data**

|          | <b>Control</b> | <b>Case</b> | <b>Total</b> |
|----------|----------------|-------------|--------------|
| Negative | 26             | 29          | 55           |
| Positive | 2              | 54          | 56           |
| Total    | 28             | 83          | 111          |

Patients determined to be positive for disease if highest Mcm5 signal available was above cut-point of 1800

<sup>a</sup> Chi-squared test P<0.001

**Supplementary Table 3:** Mcm5 signal and test sensitivity for cancer patients, categorized by bone scan and lymph node status

|                   | Pre-message |                    |                        | Post-message |                    |                       | Highest Mcm5 signal |                    |                       |
|-------------------|-------------|--------------------|------------------------|--------------|--------------------|-----------------------|---------------------|--------------------|-----------------------|
|                   | n           | Mcm5, median (IQR) | Sensitivity, % (CI) P* | n            | Mcm5, median (IQR) | Sensitivity, % (CI) P | n                   | Mcm5, median (IQR) | Sensitivity, % (CI) P |
| <b>Bone scan</b>  |             |                    |                        |              |                    |                       |                     |                    |                       |
| Negative          | 32          | 2125 (<1800–3807)  | 56 (38–74) –           | 26           | 2885 (<1800–4277)  | 62 (41–80) –          | 36                  | 3035 (<1800–4502)  | 69 (52–84) –          |
| Positive          | 18          | 4280 (1965–5960)   | 78 (52–94) 0.15        | 10           | 4660 (2492–8015)   | 90 (55–100) 0.13      | 18                  | 5270 (3290–7795)   | 89 (65–99) 0.21       |
| <b>Lymph node</b> |             |                    |                        |              |                    |                       |                     |                    |                       |
| Negative          | 23          | 2180 (<1800–3500)  | 57 (34–77) –           | 13           | 2570 (<1800–4515)  | 69 (39–91) –          | 26                  | 2565 (<1800–4132)  | 65 (44–83) –          |
| Positive          | 10          | 3475 (<1800–4585)  | 60 (26–88) 0.91        | 5            | 2260 (<1800–37780) | 60 (15–95) 0.78       | 10                  | 3665 (<1800–5912)  | 70 (35–93) 0.85       |

\* P value for sensitivity, versus base category (Chi-squared test)

**Supplementary Table 4:** Mcm5 signal and test sensitivity for cancer patients, categorized by treatment and radiotherapy status

|                  | Pre-message |                    |                     | Post-message |    |                    | Highest Mcm5 signal |      |    |                    |                     |      |
|------------------|-------------|--------------------|---------------------|--------------|----|--------------------|---------------------|------|----|--------------------|---------------------|------|
|                  | n           | Mcm5, median (IQR) | Sensitivity, % (CI) | P*           | n  | Mcm5, median (IQR) | Sensitivity, % (CI) | P    | n  | Mcm5, median (IQR) | Sensitivity, % (CI) | P    |
| Treatment status |             |                    |                     |              |    |                    |                     |      |    |                    |                     |      |
| Untreated        | 37          | 2370 (<1800–3985)  | 57 (39–73)          | –            | 31 | 3870 (2550–5870)   | 87 (70–96)          | –    | 39 | 3870 (2550–5200)   | 87 (73–96)          | –    |
| Treated          | 46          | 3300 (<1800–5405)  | 72 (57–84)          | 0.15         | 29 | 3090 (<1800–4660)  | 69 (49–85)          | 0.15 | 49 | 3500 (2030–5870)   | 78 (63–88)          | 0.36 |
| Radiotherapy     |             |                    |                     |              |    |                    |                     |      |    |                    |                     |      |
| No               | 37          | 2370 (<1800–3985)  | 57 (39–73)          | –            | 31 | 3870 (2550–5870)   | 87 (70–96)          | –    | 39 | 3870 (2550–5200)   | 87 (73–96)          | –    |
| Yes              | 21          | 2040 (<1800–5770)  | 57 (34–78)          | 1.00         | 13 | 2820 (<1800–3960)  | 54 (25–81)          | 0.04 | 23 | 3090 (<1800–5660)  | 70 (47–87)          | 0.16 |

\* P value for sensitivity, versus base category (Chi-squared test)
